# Supplementary material
Source: publisher site journal article supplement (https://www.dovepress.com/article/321852)

**Figure S1** Forest plots showing the results of the association between 15 inflammation-related genes and OS.


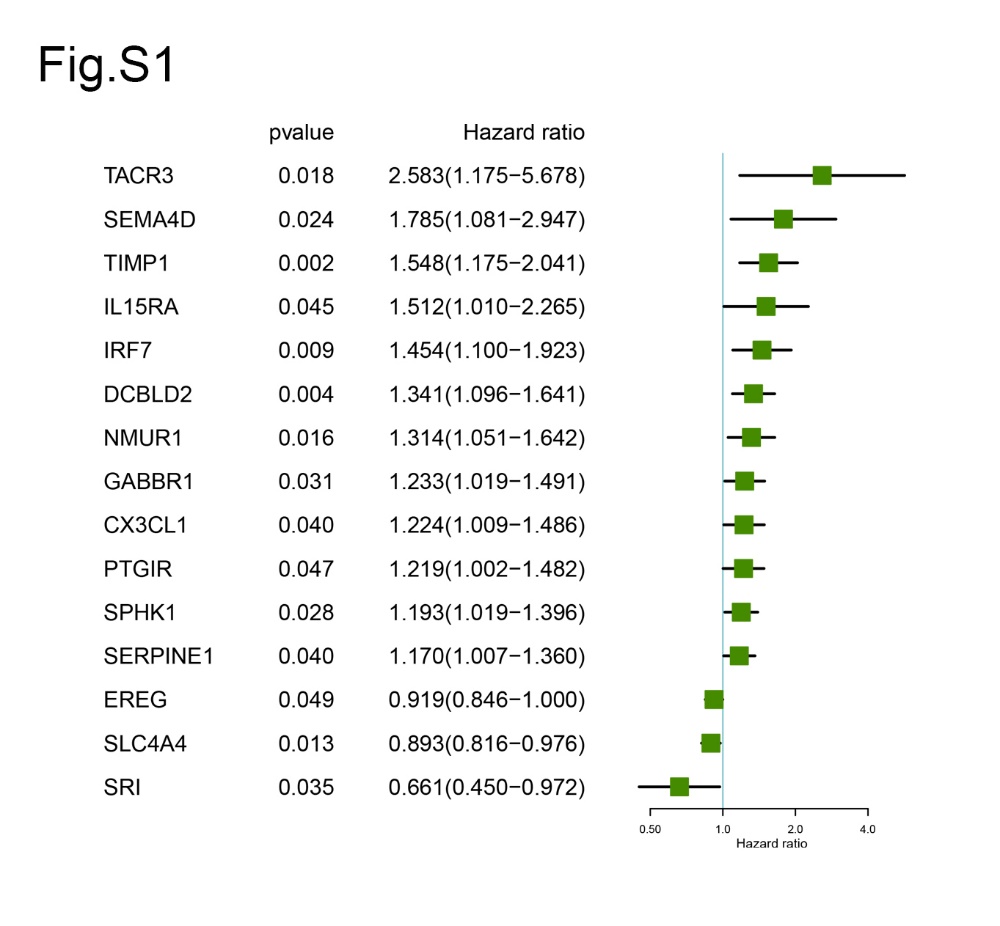

Supplement: Supplementary file 1 [file get_supplementary_file.php]
